# Supplementary material for: A binding-triggered hybridization chain reaction cascade multi-site activated CRISPR/Cas12a signal amplification strategy for sensitive detection of α-synuclein
Source: Royal Society of Chemistry journal article supplement (doi:10.1039/d4an00453a), 2024-01-01
Supplement: d4an00453a1.pdf [file d4an00453a1.pdf]

Supporting information

**Binding-Triggered Hybridization Chain Reaction Cascade Multi-site  
Activated CRISPR/Cas12a Signal Amplification Strategy for  
Sensitive Detection of  $\alpha$ -Synuclein**

**Zhenhuo Wan <sup>a</sup>, Jiahao Lu <sup>a</sup>, Nan Zhang <sup>b,\*</sup>, Wei Jiang <sup>a,\*</sup>**

<sup>a</sup> School of Chemistry and Chemical Engineering, Shandong University,  
250100, Jinan, PR China

<sup>b</sup> Research Center of Basic Medicine, Breast Center, Central Hospital Affiliated to  
Shandong First Medical University, Jinan, 250013, PR China.

\* Corresponding authors: Tel: 86-531-88363088; fax: 86-531-88564464.

E-mail: zlkzn2016@126.com (Nan Zhang), wjiang@sdu.edu.cn (Wei Jiang).

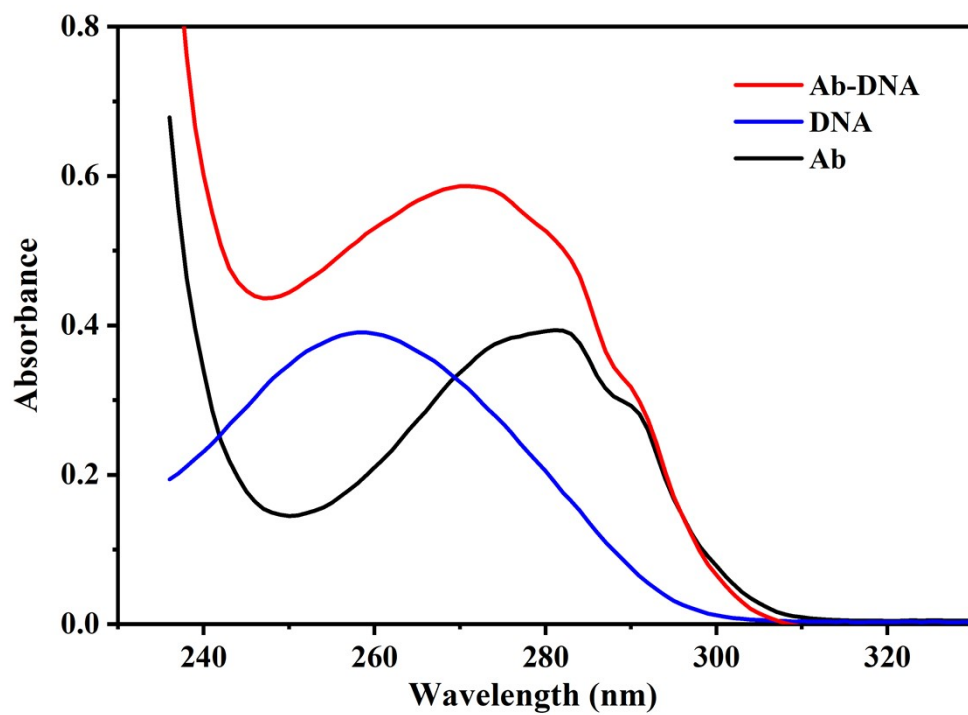

Fig. S1 UV-vis spectrum characterization of ab-DNA conjugates.

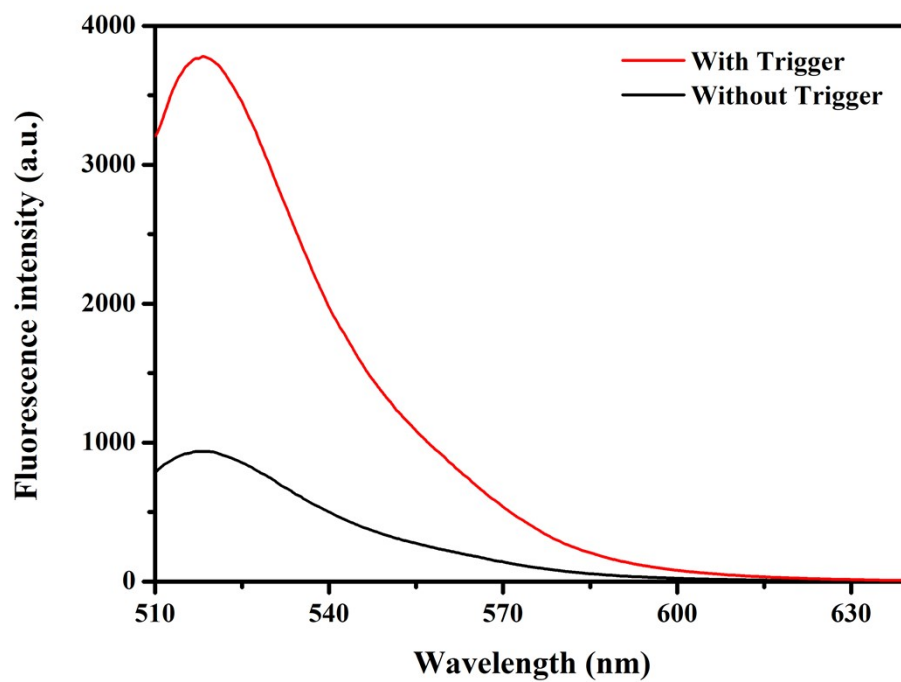

**Fig. S2** Fluorescence emission spectra of the split trigger triggered HCR cascade multi-site activated CRISPR/Cas12a signal amplification strategy under different conditions.

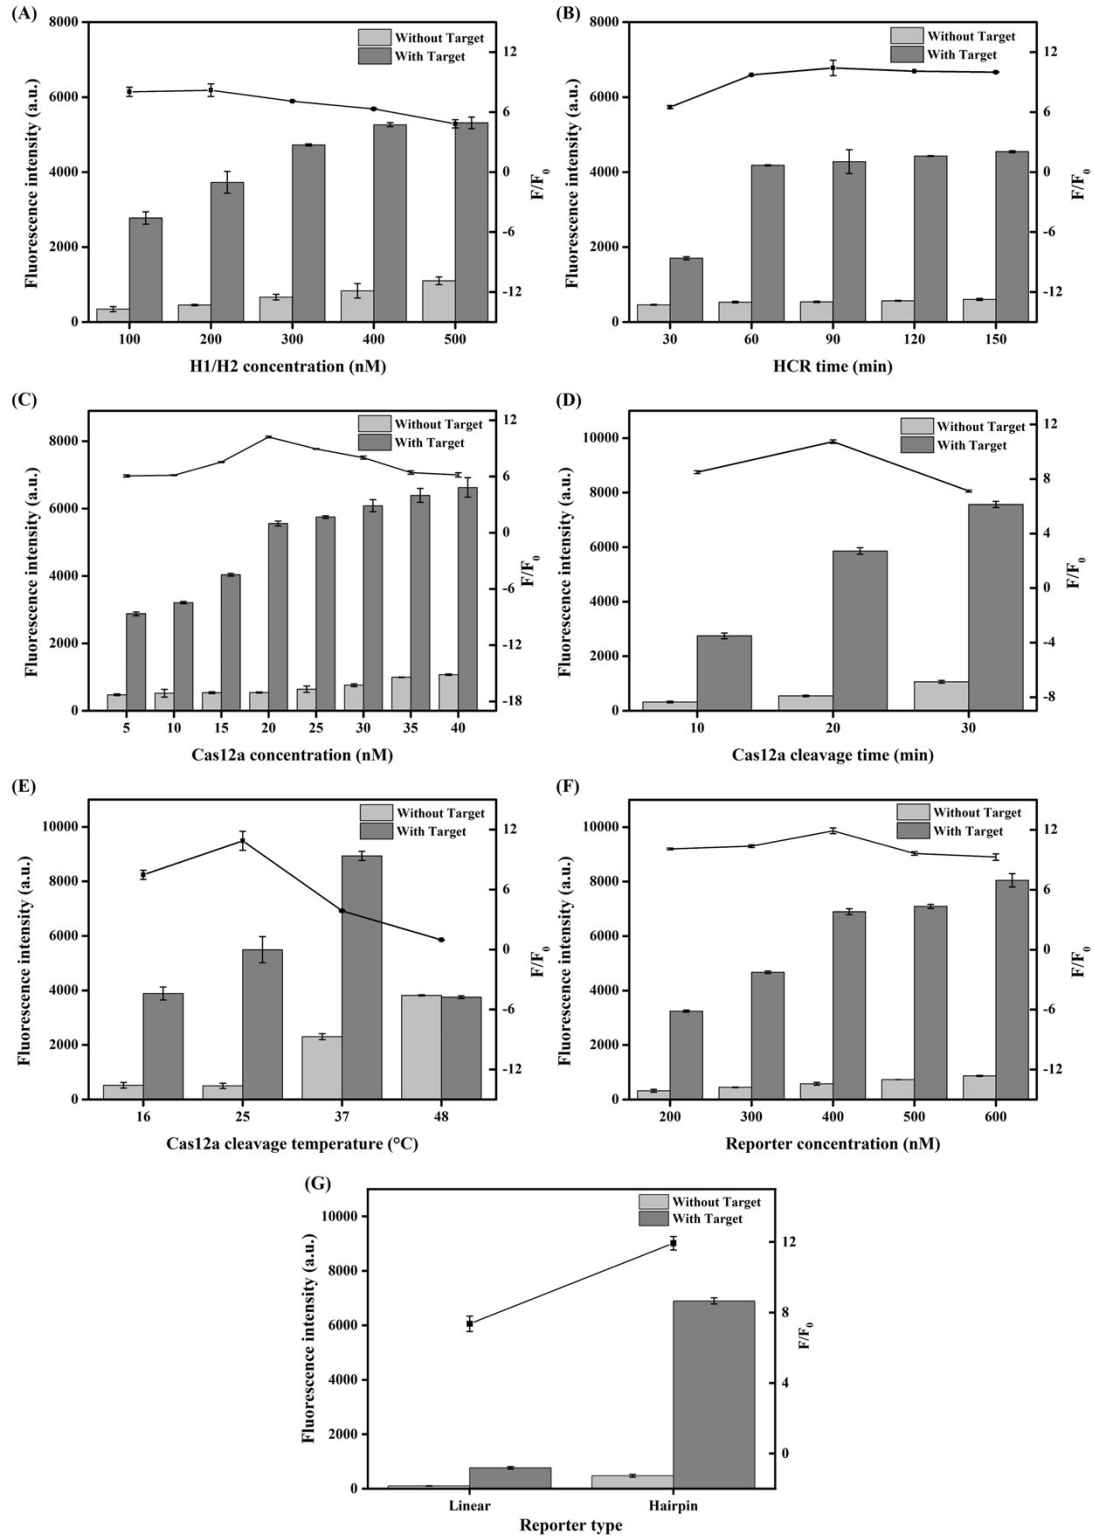

**Fig. S3** Effect of the operation conditions of our strategy on the fluorescence signal intensity and  $F/F_0$ . The histogram shows the intensity of the fluorescence signal with and without  $\alpha$ -syn, the curve shows the ratio of  $F/F_0$ .  $F$  and  $F_0$  represent the fluorescence with and without  $\alpha$ -syn, respectively.

(A) H1/H2 concentration, (B) HCR time, (C) Cas12a concentration, (D) Cas12a cleavage time, (E)

Cas12a cleavage temperature, (F) reporter concentration, (G) reporter type.

**Table S1. Sequences of oligonucleotides used in this study.**

| Name                | Sequences (5'→3')                                                        |
|---------------------|--------------------------------------------------------------------------|
| DNA1'               | <u>CGTCAGGTAGTCCGT</u> GGC GTGGGTTAA                                     |
| DNA2'               | AGTCTAGGATTC TTT <u>ACGGACTACCTGACG</u>                                  |
| Trigger             | AGTCTAGGATTC GGC GTGGGTTAA                                               |
| DNA1                | Biotin-TACGTCCAGAACTTTACCCATCTTTTTT <u>GTCCTGGGCGTGGGTTA</u><br>A        |
| DNA2                | AGTCTAGGATTC <u>TTTCAGGACTTTTTTT</u> ATCACATCAGGCTCTATGCTA<br>TTG-Biotin |
| H1                  | TTAACCCACGCCGAATCCTAGACTCAAAGTAGTCTAGGATTCGGCGT<br>G                     |
| H2                  | AGTCTAGGATTCGGCGTGGGTTAACACGCCGAAATCCTAGACTACTTT<br>G                    |
| crRNA               | UAAUUUCUACUAAGUGUAGAUGGCGUGUUA <u>ACCCACGCCGAAU</u>                      |
| Hairpin<br>reporter | (6-FAM)-CTCTCATTTTTTTTTTTAGAGAG-(BHQ1)                                   |
| Linear<br>reporter  | (6-FAM)-TTATT-(BHQ1)                                                     |

The underlined letters are complementary sequences between DNA1' and DNA2', DNA1 and DNA2, and H2 and crRNA. PAM sequences are in red. The target sequences of crRNA are in blue.

**Table S2. The results of  $\alpha$ -syn assay precision test.**

| <b>Concentration<br/>(ng mL<sup>-1</sup>)</b> | <b>Sample 1<br/>(ng mL<sup>-1</sup>)</b> | <b>Sample 2<br/>(ng mL<sup>-1</sup>)</b> | <b>Sample 3<br/>(ng mL<sup>-1</sup>)</b> | <b>RSD<br/>(n = 3)</b> |
|-----------------------------------------------|------------------------------------------|------------------------------------------|------------------------------------------|------------------------|
| 5.00                                          | 5.37                                     | 4.87                                     | 4.86                                     | 5.80%                  |
| 10.0                                          | 11.0                                     | 11.1                                     | 11.7                                     | 3.47%                  |
| 15.0                                          | 15.9                                     | 15.4                                     | 15.4                                     | 2.02%                  |

**Table S3. The results of  $\alpha$ -syn assay reproducibility test.**

| <b>Concentration<br/>(ng mL<sup>-1</sup>)</b> | <b>Sample 1<br/>(ng mL<sup>-1</sup>)</b> | <b>Sample 2<br/>(ng mL<sup>-1</sup>)</b> | <b>Sample 3<br/>(ng mL<sup>-1</sup>)</b> | <b>RSD<br/>(n = 3)</b> |
|-----------------------------------------------|------------------------------------------|------------------------------------------|------------------------------------------|------------------------|
| 5.00                                          | 5.37                                     | 4.91                                     | 5.14                                     | 4.50%                  |
| 10.0                                          | 11.0                                     | 11.3                                     | 11.6                                     | 2.82%                  |
| 15.0                                          | 15.9                                     | 15.7                                     | 16.5                                     | 2.48%                  |

**Table S4. Recovery tests of  $\alpha$ -syn detection in human serum samples.**

| <b>Sample</b> | <b>Target added<br/>(ng mL<sup>-1</sup>)</b> | <b>Target detected<br/>(ng mL<sup>-1</sup>)</b> | <b>Target<br/>recovery</b> | <b>RSD<br/>(n = 3)</b> |
|---------------|----------------------------------------------|-------------------------------------------------|----------------------------|------------------------|
| 1             | 5.00                                         | 4.64                                            | 92.8%                      | 2.25%                  |
| 2             | 10.0                                         | 10.0                                            | 100%                       | 2.76%                  |
| 3             | 15.0                                         | 15.6                                            | 106%                       | 3.91%                  |

**Table S5. Comparison of the detection performance for  $\alpha$ -syn with some reported works.**

| <b>Method</b>             | <b>Linear range</b>        | <b>LOD</b>                          | <b>Reference</b> |
|---------------------------|----------------------------|-------------------------------------|------------------|
| Surface plasmon resonance | 70-700 nM                  | 70 nM                               | [1]              |
| Electrochemistry          | 10-000 ng mL <sup>-1</sup> | 1.13 ng mL <sup>-1</sup>            | [2]              |
| Colorimetry               | 20-3000 nM                 | 10 nM                               | [3]              |
| Fluorescence              | 1-8 $\mu$ M                | 4.36 $\mu$ M                        | [4]              |
| Fluorescence              | 1-2.5 $\mu$ M              | 1 $\mu$ M                           | [5]              |
| Fluorescence              | 2-20 ng mL <sup>-1</sup>   | 9.33 pM (0.13 ng mL <sup>-1</sup> ) | This work        |



## References

- 1 A. Khatri, N. Punjabi, D. Ghosh, S. K. Maji and S. Mukherji, *Sens. Actuators, B*, 2018, **255**, 692-700.
- 2 C.-Y. Ge, M. M. Rahman, W. Zhang, N. S. Lopa, L. Jin, S. Yoon, H. Jang, G.-R. Xu and W. Kim, *Sensors*, 2020, **20**, 617.
- 3 K. Sun, N. Xia, L. Zhao, K. Liu, W. Hou and L. Liu, *Sens. Actuators, B*, 2017, **245**, 87-94.
- 4 C. W. Leung, F. Guo, Y. Hong, E. Zhao, R. T. Kwok, N. L. Leung, S. Chen, N. N. Vaikath, O. M. El-Agnaf, Y. Tang, W. P. Gai and B. Z. Tang, *Chem. Commun.*, 2015, **51**, 1866-1869.
- 5 M. Hernandez, Y. Hu and J. R. Kim, *Chem. Commun.*, 2013, **49**, 10712-10714.
